# Supplementary material for: Exploring the Immunomodulatory Potential of Pancreatic Cancer-Derived Extracellular Vesicles through Proteomic and Functional Analyses
Source: Preprints.org preprint supplement (doi:10.20944/preprints202404.0909.v1), 2024-04-15
Supplement: Supplementary file 1 [file supplementary]

**Supplemetary Table 1: Reagent mix used by Flow Cytometry**
